# Supplementary material for: Neurological Effects of Pesticide Use among Farmers in China
Source: PubMed Central journal article supplement (PMC4025041; doi:10.3390/ijerph110403995), 2014-04-14
Supplement: ijerph-11-03995-s001.pdf [file ijerph-11-03995-s001.pdf]

## Neurological Effects of Pesticide Use among Farmers in China

**Table S1.** Logistic regression models predicting neurological symptoms adjusting for pesticides poisoning history.

| Variables                                             | Numbness<br>or prickling | Muscle<br>Strength | Urinary<br>Incontinence | Constipation or<br>Diarrhea |
|-------------------------------------------------------|--------------------------|--------------------|-------------------------|-----------------------------|
| Group H<br>(Yes = 1, No = 0)                          | 0.92 *<br>(0.46)         | 1.12<br>(0.71)     | 0.17<br>(0.72)          | 0.30<br>(0.61)              |
| Pesticides poisoning history<br>(Yes = 1, No = 0)     | 0.42<br>(0.44)           | 1.28 *<br>(0.55)   | 0.15<br>(0.74)          | 0.66<br>(0.57)              |
| Other neurotoxic agents exposure<br>(Yes = 1, No = 0) | 2.12 *<br>(1.03)         | 2.97 **<br>(1.09)  | 2.59 *<br>(1.11)        | 2.12 *<br>(1.03)            |
| Female<br>(Yes = 1, No = 0)                           | 1.48 **<br>(0.51)        | 1.08<br>(0.70)     | 1.16<br>(0.84)          | -0.01<br>(0.72)             |
| Education year                                        | 0.09<br>(0.06)           | 0.05<br>(0.08)     | -0.05<br>(0.09)         | 0.05<br>(0.08)              |
| Age                                                   | 0.01<br>(0.02)           | 0.01<br>(0.03)     | -0.02<br>(0.03)         | 0.01<br>(0.02)              |
| BMI                                                   | -0.05<br>(0.05)          | -0.07<br>(0.08)    | -0.11<br>(0.09)         | -0.12<br>(0.07)             |
| Current smoker<br>(Yes = 1, No = 0)                   | 0.73<br>(0.41)           | 0.50<br>(0.62)     | 0.70<br>(0.74)          | 1.09<br>(0.57)              |
| Current drinker<br>(Yes = 1, No = 0)                  | -0.40<br>(0.36)          | -0.98<br>(0.57)    | -0.46<br>(0.65)         | -1.52 **<br>(0.55)          |
| Guangdong                                             | 0.22<br>(0.51)           | -0.34<br>(0.77)    | -0.28<br>(0.81)         | -0.61<br>(0.68)             |
| Jiangxi                                               | -0.21<br>(0.52)          | -0.10<br>(0.75)    | -1.30<br>(0.90)         | -1.18<br>(0.75)             |
| Constant                                              | -2.17<br>(1.79)          | -2.51<br>(2.64)    | 0.85<br>(2.83)          | -0.21<br>(2.48)             |
| Observations                                          | 236                      | 236                | 236                     | 236                         |

Notes: \* and \*\* indicate the statistically significant at 5% and 1%, respectively. Robust standard errors are in parentheses.

**Table S2.** Logistic regression models predicting neurological signs adjusting for pesticides poisoning history.

| Variables                                             | Pin Sensibility    | Vibration Sensibility | Deep Tendon Reflexes |
|-------------------------------------------------------|--------------------|-----------------------|----------------------|
| Group H<br>(Yes = 1, No = 0)                          | −0.04<br>(0.53)    | 0.83<br>(0.57)        | 0.28<br>(0.55)       |
| Pesticides poisoning history<br>(Yes = 1, No = 0)     | 0.13<br>(0.62)     | 0.74<br>(0.51)        | 0.68<br>(0.55)       |
| Other neurotoxic agents<br>exposure (Yes = 1, No = 0) | 1.19<br>(1.23)     | 1.92<br>(1.30)        | 2.15 *<br>(1.08)     |
| Female<br>(Yes = 1, No = 0)                           | 1.66 *<br>(0.67)   | 1.33 *<br>(0.63)      | 0.44<br>(0.66)       |
| Education year                                        | 0.23 **<br>(0.08)  | 0.09<br>(0.07)        | 0.06<br>(0.07)       |
| Age                                                   | −0.02<br>(0.02)    | −0.01<br>(0.02)       | 0.05 *<br>(0.02)     |
| BMI                                                   | 0.13<br>(0.07)     | 0.005<br>(0.07)       | 0.07<br>(0.07)       |
| Current smoker<br>(Yes = 1, No = 0)                   | 0.92<br>(0.54)     | 1.22 *<br>(0.53)      | 0.73<br>(0.52)       |
| Current drinker<br>(Yes = 1, No = 0)                  | 0.15<br>(0.46)     | −0.49<br>(0.42)       | 0.67<br>(0.43)       |
| Guangdong                                             | 0.74<br>(0.74)     | 1.12<br>(0.80)        | 0.29<br>(0.72)       |
| Jiangxi                                               | 2.27 **<br>(0.71)  | 2.66 **<br>(0.78)     | 1.73 **<br>(0.67)    |
| Constant                                              | −8.02 **<br>(2.66) | −4.96 *<br>(2.43)     | −8.11 **<br>(2.54)   |
| Observations                                          | 236                | 236                   | 236                  |

Notes: \* and \*\* indicate the statistically significant at 5% and 1%, respectively. Robust standard errors are in parentheses.
